# Supplementary material
Source: Royal Society of Chemistry journal article supplement (doi:10.1039/d6cc02065h)
Supplement: d6cc02065h1.pdf [file d6cc02065h1.pdf]

## **Interfacial Electric Field Modulation of 1D/2D FeCo<sub>2</sub>O<sub>4</sub>/g-C<sub>3</sub>N<sub>4</sub> Heterostructures for Lithium Sulfur Batteries Over Wide Temperatures**

Mengqing Wang,<sup>a,b</sup> Caixiang Wang,<sup>a,b</sup> Qin Tang,<sup>b</sup> Baojun Hou,<sup>b</sup> Zhenjie Cheng,<sup>\*a</sup> Tengfei Duan,<sup>\*c</sup> Lu Wang,<sup>\*d,e</sup> Manfang Chen<sup>\*b</sup>

<sup>a</sup> Zhejiang Key Laboratory for Island Green Energy and New Materials, School of Materials Science and Engineering, Taizhou University, Taizhou 318000, Zhejiang, P. R. China

<sup>b</sup> National Base for International Science & Technology Cooperation of New Energy Equipment, Energy Storage Materials and Devices; School of Chemistry, Xiangtan University, Xiangtan 411105, Hunan, P. R. China

<sup>c</sup> School of Materials Science and Engineering, Hunan Key Laboratory of Electrochemical Green Metallurgy Technology, Hunan University of Technology, Zhuzhou 412007, Hunan, P. R. China

<sup>d</sup> Key Laboratory of Green and Precise Synthetic Chemistry and Applications Ministry of Education, College of Energy Science and Engineering, Huaibei Normal University, Huaibei 235000, Anhui, P. R. China

<sup>e</sup> School of Materials Science and Engineering, Shandong University, Jinan 250061, Shandong, P. R. China.

\* E-mail: (M. F. Chen) mfchen@xtu.edu.cn; (L. Wang) wanglu@chnu.edu.cn; (Z. J. Cheng) zjcheng@tzc.edu.cn

## **1. Experimental section**

### **1.1 Chemicals and Materials**

Cobalt nitrate hexahydrate ( $\text{Co}(\text{NO}_3)_2 \cdot 6\text{H}_2\text{O}$ , AR grade, 99%), iron(III) nitrate nonahydrate ( $\text{Fe}(\text{NO}_3)_3 \cdot 9\text{H}_2\text{O}$ , AR grade, 99%), urea ( $\text{CO}(\text{NH}_2)_2$ , 99%), ammonium fluoride ( $\text{NH}_4\text{F}$ , 98%), and melamine ( $\text{C}_3\text{H}_6\text{N}_6$ , 99%) were all purchased from Macklin Biochemical. All chemical reagents were used as received without further purification.

### **1.2 Synthesis of g- $\text{C}_3\text{N}_4$ .**

9 g of melamine were placed in a covered ceramic boat, heated in air from room temperature to 500 °C at a heating rate of 10 °C per minute, held for 2 h, and then cooled to room temperature to obtain a light-yellow solid.

### **1.3 Synthesis of $\text{FeCo}_2\text{O}_4$ .**

0.476 g of  $\text{Co}(\text{NO}_3)_2 \cdot 6\text{H}_2\text{O}$ , 0.404 g of  $\text{Fe}(\text{NO}_3)_3 \cdot 9\text{H}_2\text{O}$ , 0.901 g of  $\text{CO}(\text{NH}_2)_2$ , and 0.222 g of  $\text{NH}_4\text{F}$  were stirred and dissolved in 60 mL of deionized water. Then, the mixed solution was transferred into a 100 mL high-pressure autoclave and maintained at 120 °C for 12 h. After cooling, washing, and drying, the product was heated in a tube furnace at 400 °C for 2 h under an air atmosphere to obtain  $\text{FeCo}_2\text{O}_4$  nanorods.

### **1.4 Synthesis of $\text{FeCo}_2\text{O}_4/\text{g-}\text{C}_3\text{N}_4$ .**

0.200 g of g- $\text{C}_3\text{N}_4$  and 0.010 g of  $\text{FeCo}_2\text{O}_4$  were placed in 10 mL of ethanol and ultrasonically dispersed for 30 minutes. After drying, the resulting sample was heated at 550 °C for 1 h under a nitrogen atmosphere to prepare the  $\text{FeCo}_2\text{O}_4/\text{g-}\text{C}_3\text{N}_4$  heterojunction.

### **1.5 Material characterization**

An X-ray diffractometer (XRD, D8 Advances, Bruker, Germany) was used to determine the crystal structure of  $g\text{-C}_3\text{N}_4$  and  $\text{FeCo}_2\text{O}_4/g\text{-C}_3\text{N}_4$ . To investigate the surface chemical component, X-ray photoelectron spectroscopy (XPS, ESCALAB Xi<sup>+</sup>, Thermo Scientific, USA) was used. The structure and morphology of the as-prepared materials were investigated using scanning electron microscopy (SEM, JSM-6610LV, Japan; TESCAN MIRA3, Czech Republic) and transmission electron microscopy (TEM, JEM-2100F, Japan). In order to determine the specific surface area and pore size distribution,  $\text{N}_2$  isothermal adsorption/desorption data were collected by a static physical adsorption apparatus (BK-112, China).

### **1.6 Synthesis of $\text{FeCo}_2\text{O}_4/g\text{-C}_3\text{N}_4$ separators**

The polyvinylidene fluoride (PVDF) and conductive carbon dark (SP) were combined with the  $\text{FeCo}_2\text{O}_4/g\text{-C}_3\text{N}_4$  at a weight ratio of 1:2:7. The  $\text{FeCo}_2\text{O}_4/g\text{-C}_3\text{N}_4$  coated membranes were obtained by mixing well in N-methylpyrrolidone (NMP) solution and then coated on Celgard polypropylene (PP) film.  $g\text{-C}_3\text{N}_4$  coated membranes were prepared using the same technique. The functional layer of the separator with a loading of approximately  $0.58 \text{ mg/cm}^2$ .

### **1.7 Preparation of Cathode**

Carbon nanotubes (original from Cnano Technology) and sublimed sulfur were typically combined uniformly in a weight ratio of 7:3 and heated at  $155 \text{ }^\circ\text{C}$  for 12 h to produce CNT/S. CNT/S, PVDF and conductive Super P mixed uniformly at a weight proportion of 7:2:1 in a NMP solution to obtain the slurry of cathode electrodes. The slurry was evenly coated on the charcoal coated aluminum foil. The foil was dried at

60 °C for 12 h in the vacuum and cut into disks with a diameter of 10 mm and a sulfur load of 1.40 mg/cm<sup>2</sup>. Cathodes with higher sulfur loadings (4.41 mg/cm<sup>2</sup> and 6.42 mg/cm<sup>2</sup>) were obtained by coating a slurry onto carbon paper (Toray origin).

### **1.8 Preparation of the Li<sub>2</sub>S<sub>8</sub> Solution, Li<sub>2</sub>S<sub>6</sub> Solution and Related Batteries.**

S and Li<sub>2</sub>S were mixed well in a molar ratio of 5:1 and then dissolved in the DOL/DME (v/v = 1/1) solution to obtain the 0.1 M solution of Li<sub>2</sub>S<sub>6</sub>, which was used as the electrolyte for the symmetric cell. The electrodes for the symmetric cells were prepared by homogenizing a mixture of catalytic materials (g-C<sub>3</sub>N<sub>4</sub> and FeCo<sub>2</sub>O<sub>4</sub>/g-C<sub>3</sub>N<sub>4</sub>) without S and PVDF (mass ratio = 9:1). CV curves of symmetric cells were recorded at a scan rate of 10 mV/s and a voltage range of -1.0 to 1.0 V. The cell for testing the precipitation and dissolution of Li<sub>2</sub>S was made in a similar way to a normal cell, but the electrolyte was the prepared Li<sub>2</sub>S<sub>8</sub> solution. S and Li<sub>2</sub>S were mixed well in a molar ratio of 7:1 and then dissolved in the DOL/DME (v/v = 1/1) solution to obtain the 0.1 M solution of Li<sub>2</sub>S<sub>8</sub>. The cell was discharged at a constant current of 0.112 mA to 2.06 V and then at a constant voltage of 2.05 V to observe the corresponding current–time curve. Li<sub>2</sub>S dissolution experiments were performed by discharging the battery completed with Li<sub>2</sub>S deposition experiments to 1.7 V at constant current at 0.112 mA and then charging it at a constant voltage of 2.4 V and observing the time–current curve.

### **1.9 Measurements of the galvanostatic intermittent titration technique (GITT).**

A protocol involving a current pulse at 0.1 C for 10 minutes followed by 60 minutes of rest was utilized. The internal resistance could be quantified by the following relation equation:

$$\Delta R_{\text{internal}}(\Omega) = |\Delta iR| / I_{\text{applied}} \quad \text{S1}$$

Where  $\Delta E$  is the voltage difference between the quasi-open-circuit voltage and closed-circuit voltage points, and  $I_{\text{applied}}$  is the applied current.

### 1.10 Electrochemical Measurements

Cathodes with sulfur loadings of 1.40 mg/cm<sup>2</sup>, 4.41 mg/cm<sup>2</sup>, and 6.42 mg/cm<sup>2</sup> were prepared by mixing the synthesized material, conductive carbon Super P, and polyvinylidene fluoride (PVDF) in a mass ratio of 7:2:1. CR2025 coin cells were assembled using the cathode, a separator (Celgard 2400), an anode (lithium metal), and an electrolyte. The electrolyte consisted of a 1,3-dioxolane/1,2-dimethoxyethane (DOL/DME, v/v=1/1) solvent mixture, 1 M lithium bis (trifluoromethane) sulfonyl imide (LiTFSI), and 1 wt% lithium nitrate (LiNO<sub>3</sub>). The electrolyte volume used was 30–40 μL. The E/S ratio for the high-sulfur-loading cells was 8 μL/mg and 6 μL/mg for sulfur cathodes of 4.4 mg cm<sup>-2</sup> and 6.4 mg cm<sup>-2</sup>, respectively. Galvanostatic charge-discharge tests were performed within a voltage range of 1.7–2.8 V using a battery testing system (Neware CT-4800T). Cyclic voltammetry measurements were conducted on a CHI 660E instrument at stated scan rates, generally for 0.1 0.2 0.3 0.4 0.5 mv/s. Electrochemical impedance spectroscopy (EIS) was recorded on a CHI 660E instrument over a frequency range of 10<sup>5</sup> Hz to 10<sup>-2</sup> Hz.

The Randles-Sevcik equation:

$$I_p = 2.69 \times 10^5 n^{3/2} A D_{Li^+}^{1/2} C_{Li^+} v^{1/2} \quad S2$$

where the peak current is denoted by  $I_p$ , the number of electrons in the response is denoted by  $n$ , the cathode area ( $0.785 \text{ cm}^2$ ) is denoted by  $A$ , the  $Li^+$  diffusion coefficient is denoted by  $D_{Li^+}$ , the electrolyte  $Li^+$  concentration is denoted by  $C_{Li^+}$ , and the rate is denoted by  $v$ .

### 1.11 Preparation of the In Situ UV-vis Experiment.

The same methods as before are used to prepare materials for cathodes that contain S. The In Situ UV-vis cells were constructed in an Ar-filled glovebox utilizing a specially manufactured in situ cuvette (bought from Tianjin Aida Hengsheng Technology Development Co., LTD) with pristine g- $C_3N_4/S$  and  $FeCo_2O_4/g-C_3N_4/S$  electrode as the cathode and Li metal as the anode. On an electrochemical workstation, the in situ cuvette cell was galvanostatically discharged at 0.05 C. From the start of the discharge until the end of the discharge, UV-vis spectra with a wavelength range of 400 – 750 nm were recorded for batteries, and the spectra were collected continuously. (High S areal loading:  $4.39 \text{ mg/cm}^2$ ) The transformation process of S species is as follows:

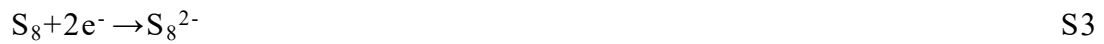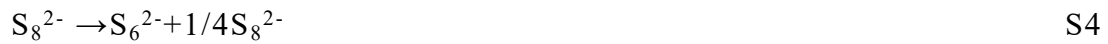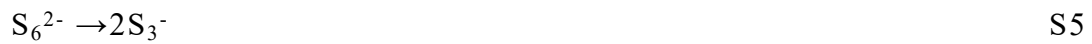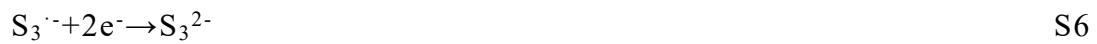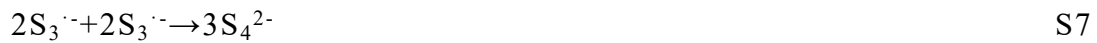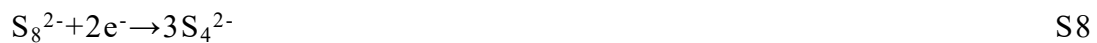

## 1.12 Density functional theory calculations

All spin-polarized calculations were performed using the Vienna *ab initio* simulation package (VASP)<sup>[1-2]</sup> based on density generalized function theory (DFT). The electron exchange correlation was described by the gradient-corrected Perdew-Burke-Ernzerh (GGA-PBE) functional.<sup>[3]</sup> Ion-electron interaction was described by the projector augmented-wave (PAW) method.<sup>[4]</sup> We built a heterojunction model consists  $1 \times 1 \times 1$  supercell  $\text{FeCo}_2\text{O}_4$  (311) surfaces and  $3 \times 4 \times 1$  supercell g- $\text{C}_3\text{N}_4$ , totaling 504 atoms. The cutoff energy was set to be 450 eV, and the total energy and force convergence for geometric optimization was set to  $10^{-5}$  and 0.01 eV/Å, respectively. Integration in the Brillouin zone was performed based on the Monkhorst-Pack scheme using a  $\Gamma$  centered  $2 \times 1 \times 1$  k-point mesh in each primitive lattice vector of the reciprocal space for optimization. The vacuum layer was set to 20 Å and a semi-empirical correction of DFT-D3<sup>[5]</sup> was adopted to account for the interaction of van der Waals forces. Charge density difference<sup>[6]</sup> analysis was performed to qualitatively describe the differences of charge distribution between polysulfides and substrates.

The adsorption energy ( $E_{\text{ad}}$ ) of  $\text{Li}_2\text{S}_6$  on  $\text{FeCo}_2\text{O}_4$  (311) and g- $\text{C}_3\text{N}_4$  surfaces can be written as

$$E_{\text{ad}} = E_{(\text{sub} + \text{Li}_2\text{S}_6)} - E_{(\text{sub})} - E_{(\text{Li}_2\text{S}_6)}$$

$E_{(\text{sub} + \text{Li}_2\text{S}_6)}$  is the total energy of  $\text{Li}_2\text{S}_6$  adsorbed on the substrate.  $E_{(\text{sub})}$  is the total energy of substrate  $E_{(\text{Li}_2\text{S}_6)}$  is the total energy of  $\text{Li}_2\text{S}_6$ .

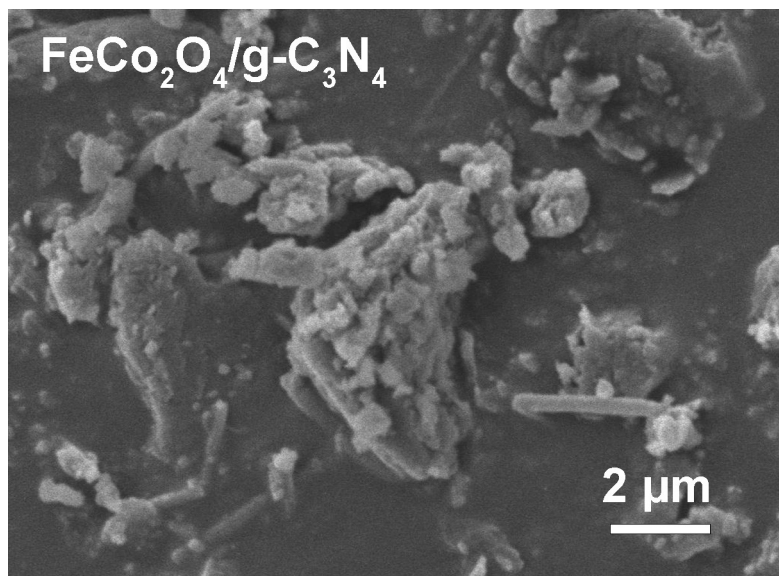

**Figure S1.** SEM of FeCo<sub>2</sub>O<sub>4</sub>/g-C<sub>3</sub>N<sub>4</sub>.

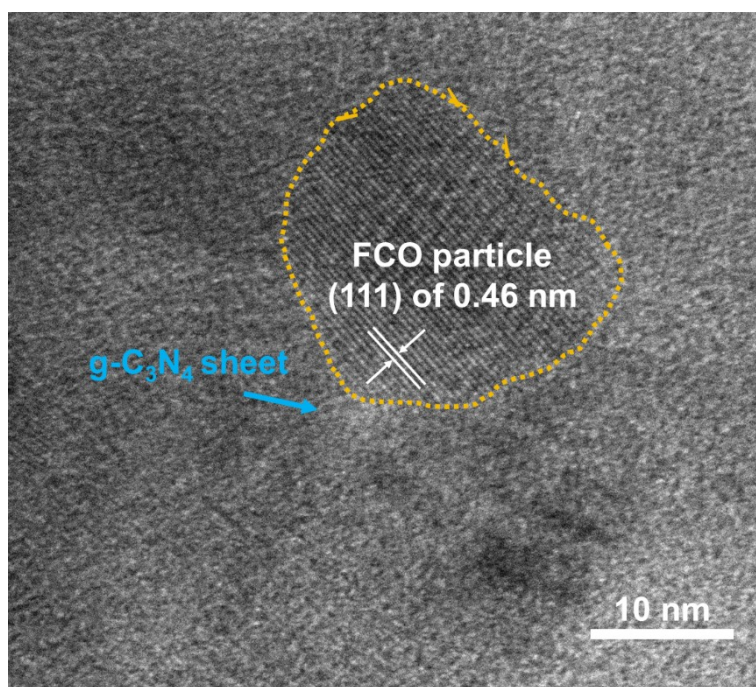

**Figure S2.** HRTEM image of FeCo<sub>2</sub>O<sub>4</sub>/g-C<sub>3</sub>N<sub>4</sub> compositing with FeCo<sub>2</sub>O<sub>4</sub> nanoparticle loaded on g-C<sub>3</sub>N<sub>4</sub> nano-sheet.

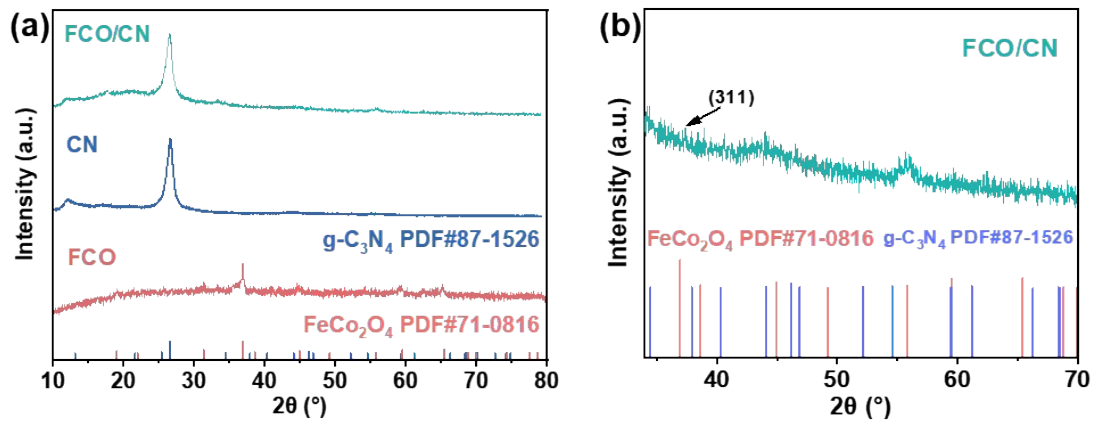

**Figure S3.** (a) XRD patterns of g-C<sub>3</sub>N<sub>4</sub>, FeCo<sub>2</sub>O<sub>4</sub> and FeCo<sub>2</sub>O<sub>4</sub>/g-C<sub>3</sub>N<sub>4</sub>; (b) Enlarged view of the diffraction peaks for XRD pattern of FeCo<sub>2</sub>O<sub>4</sub>/g-C<sub>3</sub>N<sub>4</sub>.

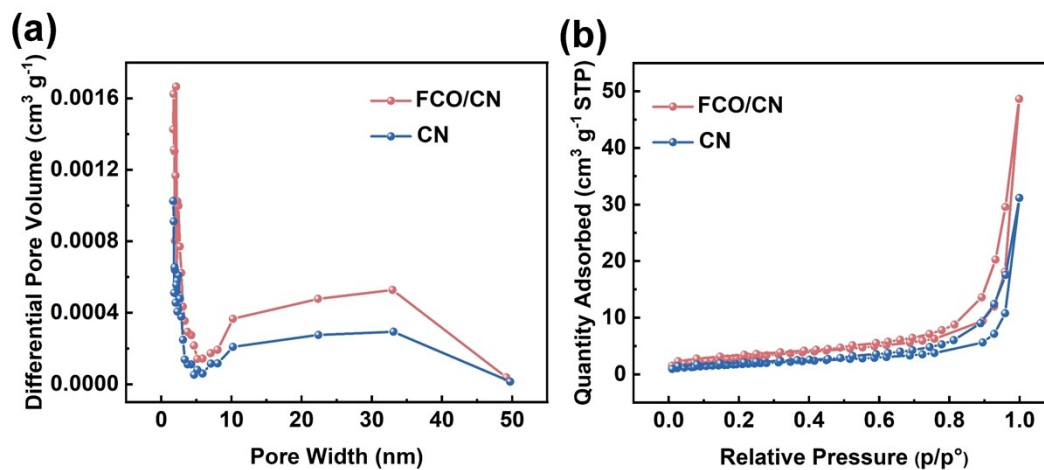

**Figure S4.** a) N<sub>2</sub> isothermal adsorption and desorption curves and corresponding b) pore-size distribution.

**Table S1** Porosity properties from the N<sub>2</sub> adsorption-desorption isotherm of samples.

| Samples | V <sub>total</sub> (cm <sup>3</sup> g <sup>-1</sup> ) | S <sub>BET</sub> (m <sup>2</sup> g <sup>-1</sup> ) | D <sub>Pore,mean</sub> (nm) by BJH |
|---------|-------------------------------------------------------|----------------------------------------------------|------------------------------------|
| FCO/CN  | 0.075                                                 | 11.17                                              | 29.14                              |
| CN      | 0.048                                                 | 6.61                                               | 26.95                              |

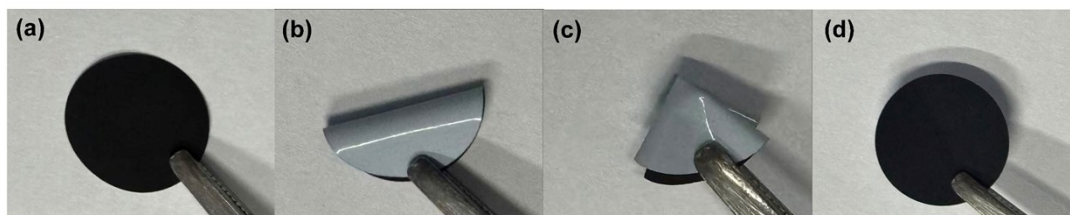

**Figure S5.** (a-d) Flexibility testing of  $\text{FeCo}_2\text{O}_4/\text{g-C}_3\text{N}_4$  separator.

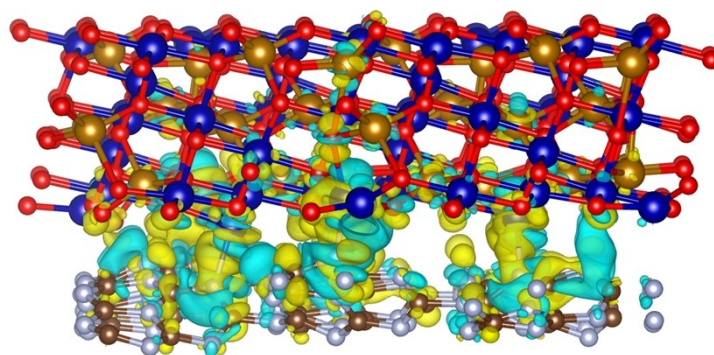

**Figure S6.** Charge density difference map for the FeCo<sub>2</sub>O<sub>4</sub>/g-C<sub>3</sub>N<sub>4</sub> heterojunction.

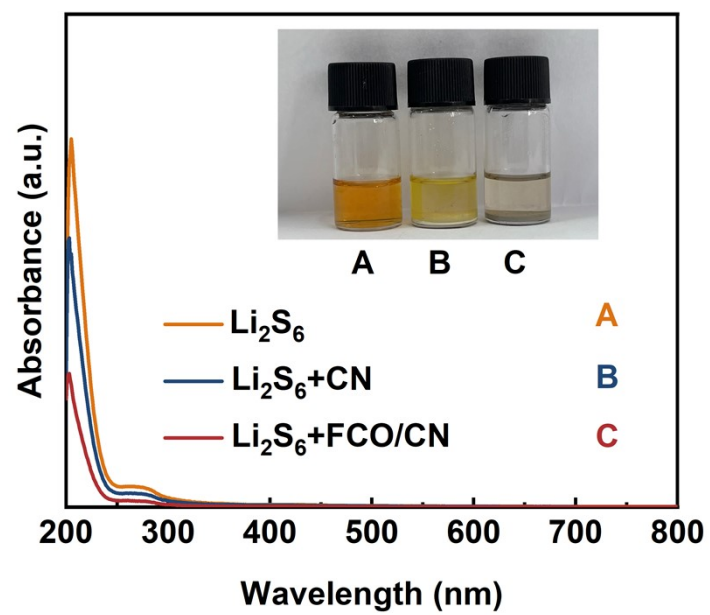

**Figure S7.** Optical image and UV - vis spectra of  $\text{Li}_2\text{S}_6$  with adsorption.

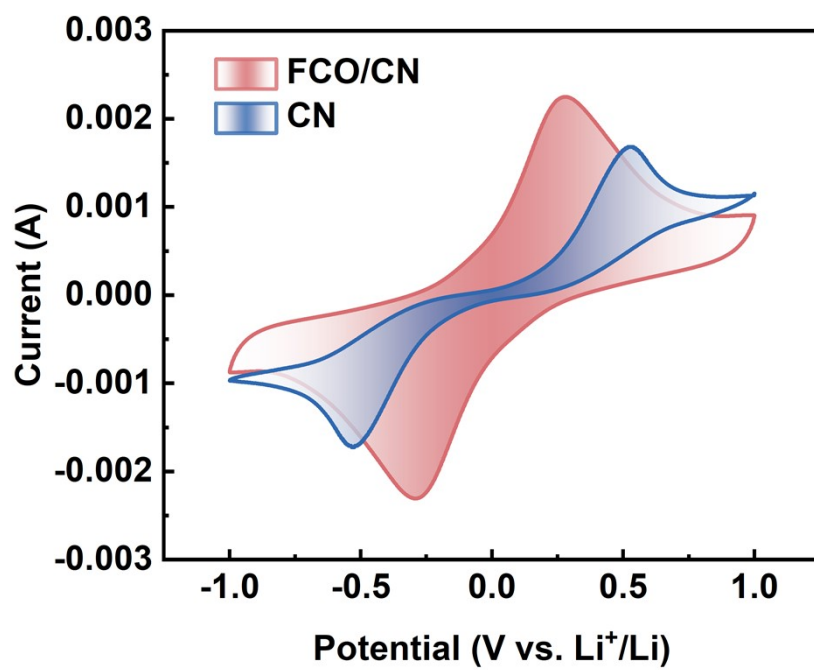

**Figure S8.** Electrochemical cyclic voltammetry measurements of symmetry cells at scan rate of 0.01 V/s.

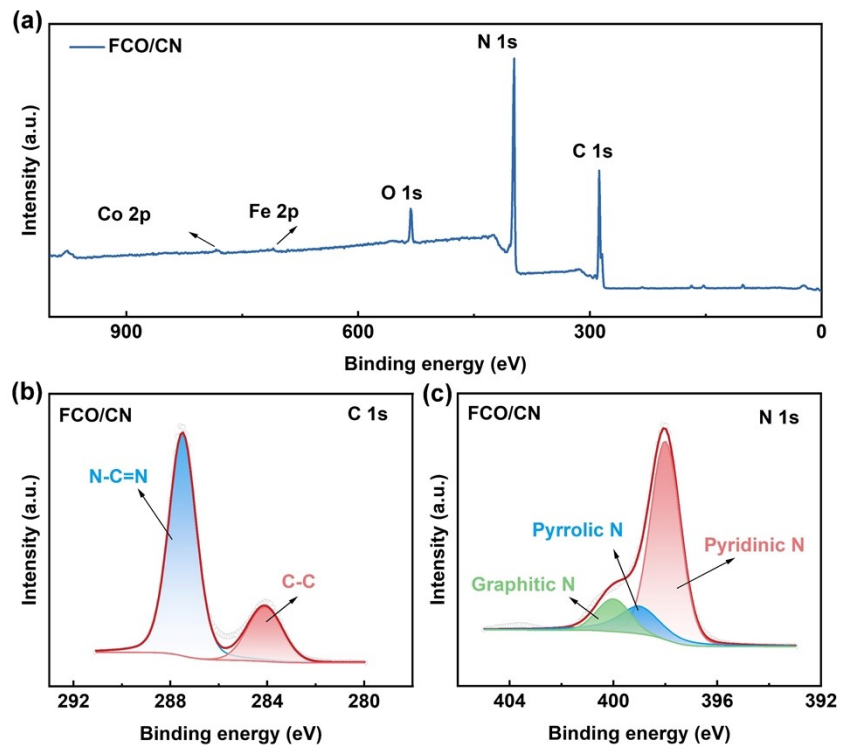

**Figure S9.** (a) XPS full survey of FeCo<sub>2</sub>O<sub>4</sub>/g-C<sub>3</sub>N<sub>4</sub>. XPS spectra of (b) C 1s and (c) N 1s in FeCo<sub>2</sub>O<sub>4</sub>/g-C<sub>3</sub>N<sub>4</sub>.

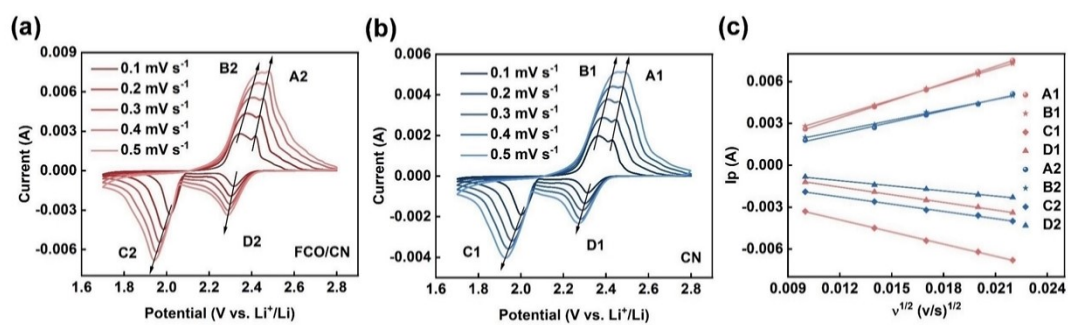

**Figure S10.** CV curves of the cell with (a) FeCo<sub>2</sub>O<sub>4</sub>/g-C<sub>3</sub>N<sub>4</sub> and (b) g-C<sub>3</sub>N<sub>4</sub>. Linear relationship between I<sub>p</sub> and v<sup>1/2</sup> of (c) FeCo<sub>2</sub>O<sub>4</sub>/g-C<sub>3</sub>N<sub>4</sub>.

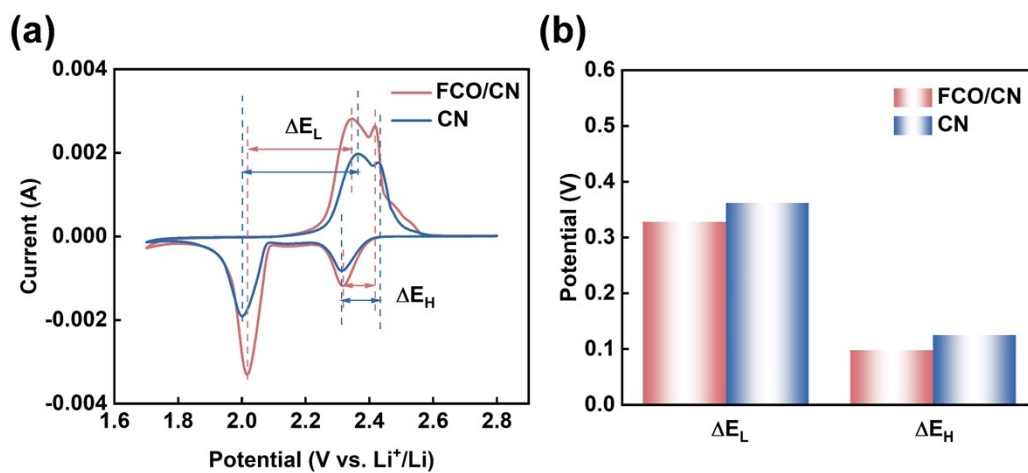

**Figure S11.** (a) Comparison of CV curves at  $0.1 \text{ mV s}^{-1}$ . (b) Comparison of  $\Delta E_L$  and  $\Delta E_H$ .

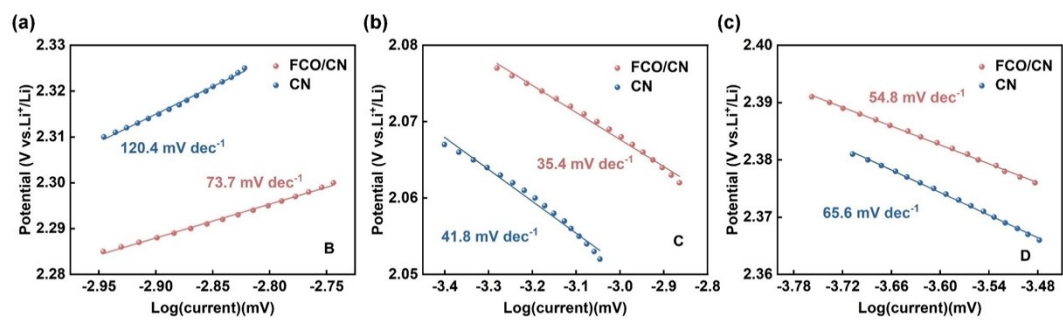

**Figure S12.** (a-c) Tafel plots derived from redox peaks B, C, and D in the CV profiles measured at a scan rate of 0.1 mV/s.

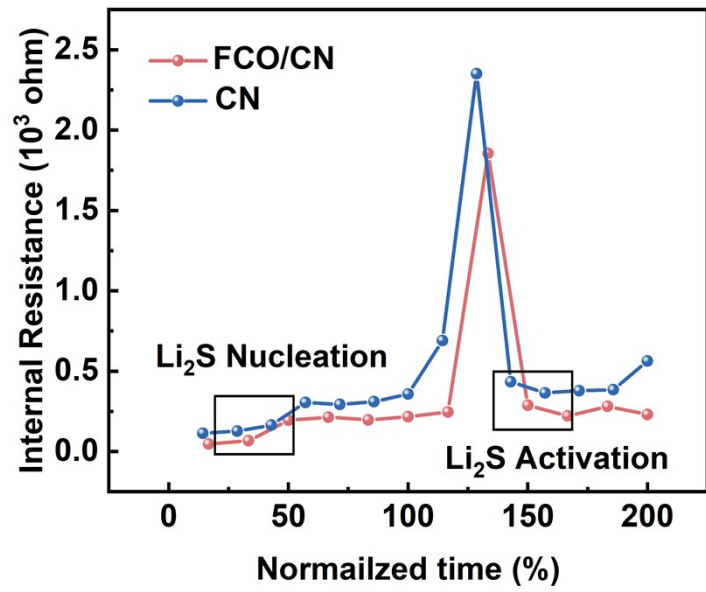

**Figure S13.** Internal resistance based on GITT.

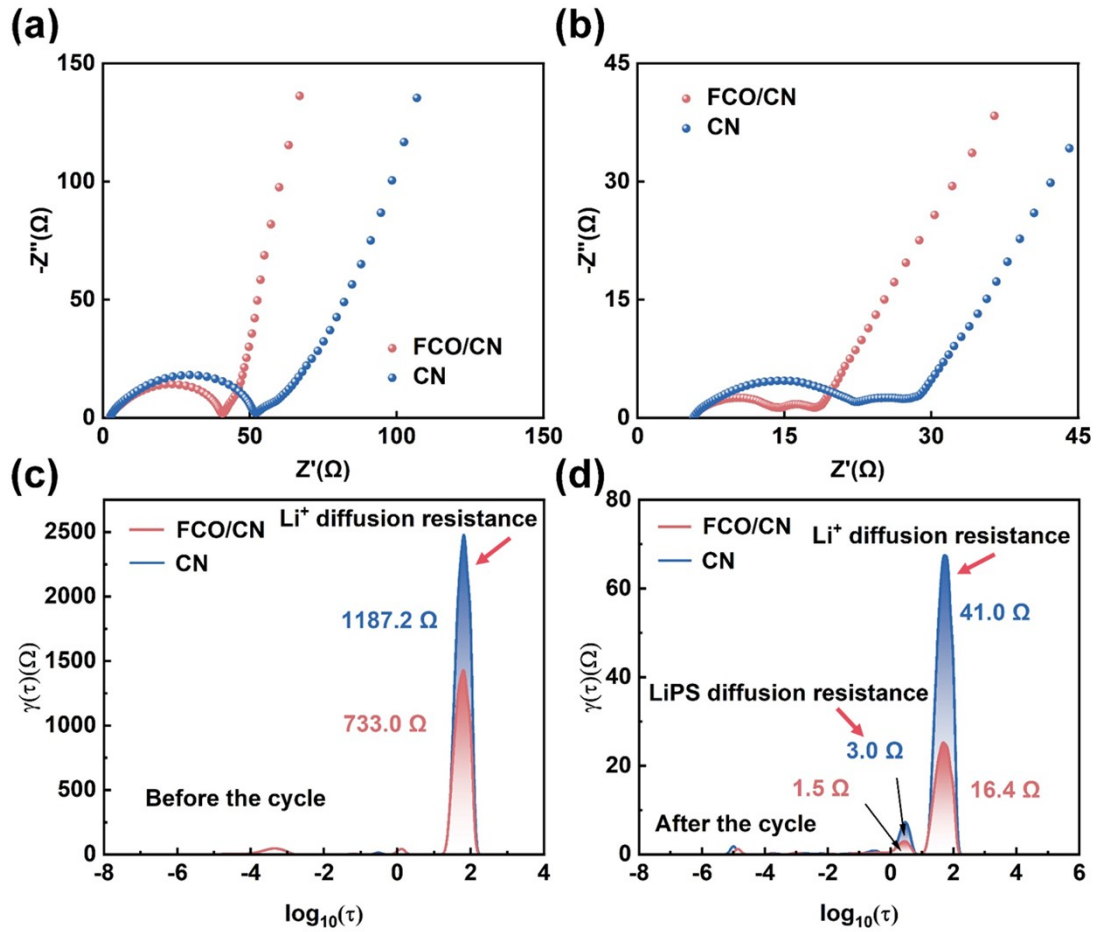

**Figure S14.** (a) EIS before and (b) after the cycle. (c-d) Discrete impedance spectrum relaxation time plots. The peak at low frequencies ( $\tau > 1$  s) is characteristic of Li<sup>+</sup> diffusion processes. The peak in the mid-frequency region ( $\tau \approx 10^{-3}$ – $10^{-1}$  s) corresponds to the charge transfer resistance associated with the electrocatalytic conversion of lithium polysulfides at the modifier/electrolyte interface. The peak observed in the high-frequency region ( $\tau \approx 10^{-5}$ – $10^{-4}$  s) is attributed to the ionic transport resistance through the separator coating layer and the contact impedance between the coating and the current collector.

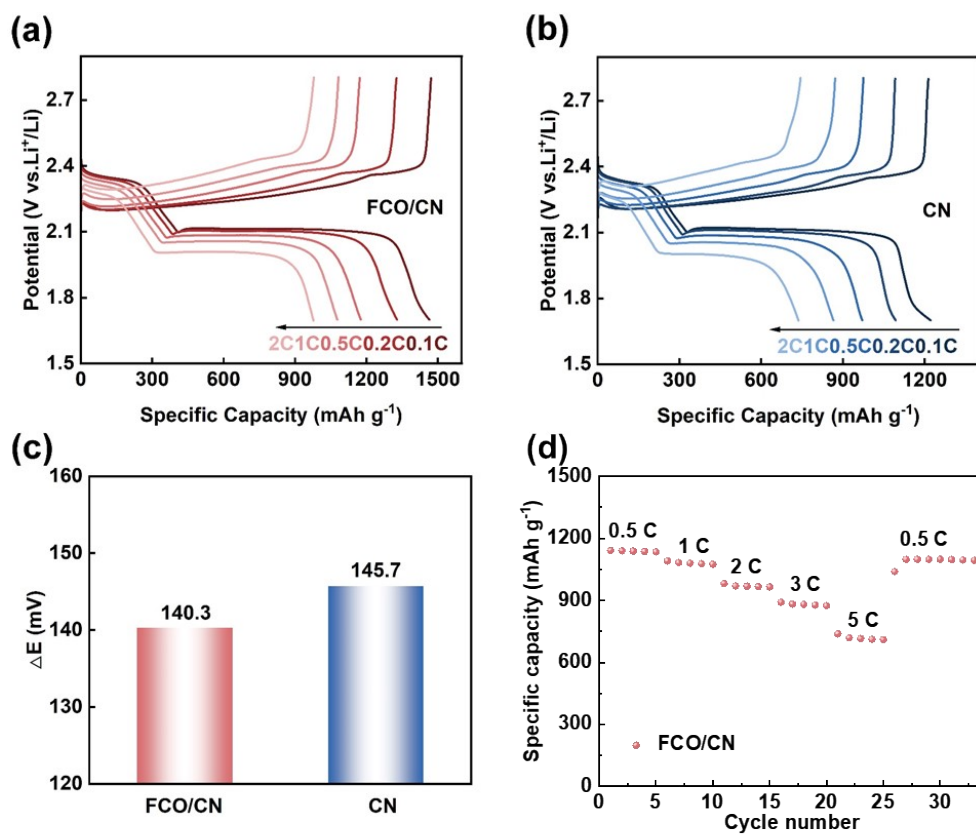

**Figure S15.** GCD curve of (a) FeCo<sub>2</sub>O<sub>4</sub>/g-C<sub>3</sub>N<sub>4</sub> and (b) g-C<sub>3</sub>N<sub>4</sub>. (c)  $\Delta E$  from GCD curves of FeCo<sub>2</sub>O<sub>4</sub>/g-C<sub>3</sub>N<sub>4</sub> and g-C<sub>3</sub>N<sub>4</sub>. (d) Rate performance of FeCo<sub>2</sub>O<sub>4</sub>/g-C<sub>3</sub>N<sub>4</sub> derived battery regarding higher current densities up-to 5 C.

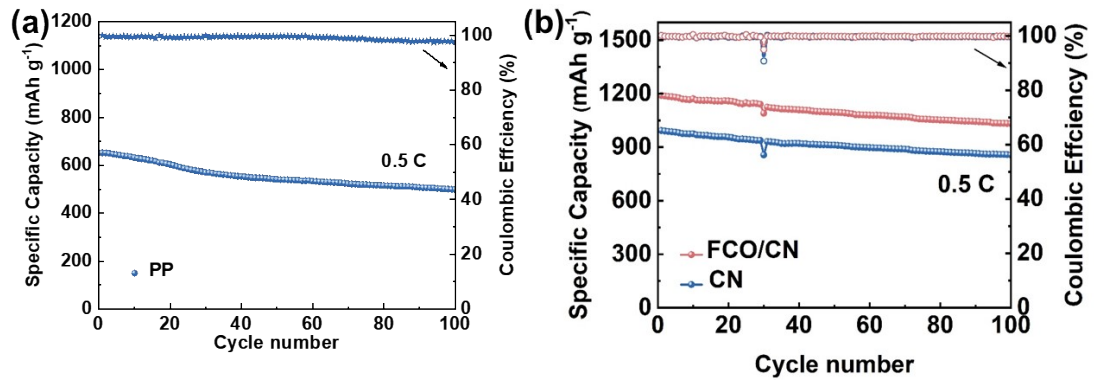

**Figure S16.** The cyclic performance of an unmodified separator (defined as PP), in comparison with those of FCO/CN and CN.

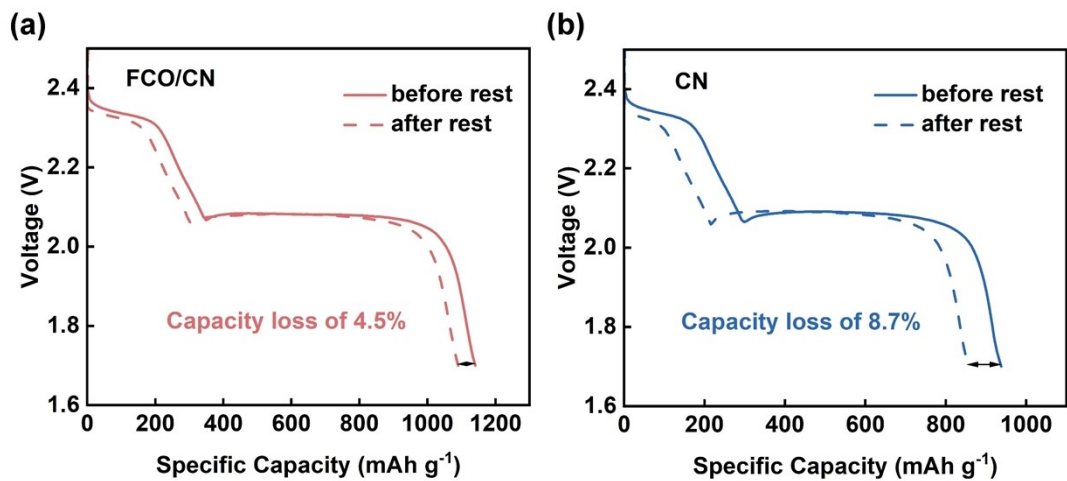

**Figure S17.** Discharge curves and self-discharge measurement of the cells with (a) FeCo<sub>2</sub>O<sub>4</sub>/g-C<sub>3</sub>N<sub>4</sub> and (b) g-C<sub>3</sub>N<sub>4</sub>.

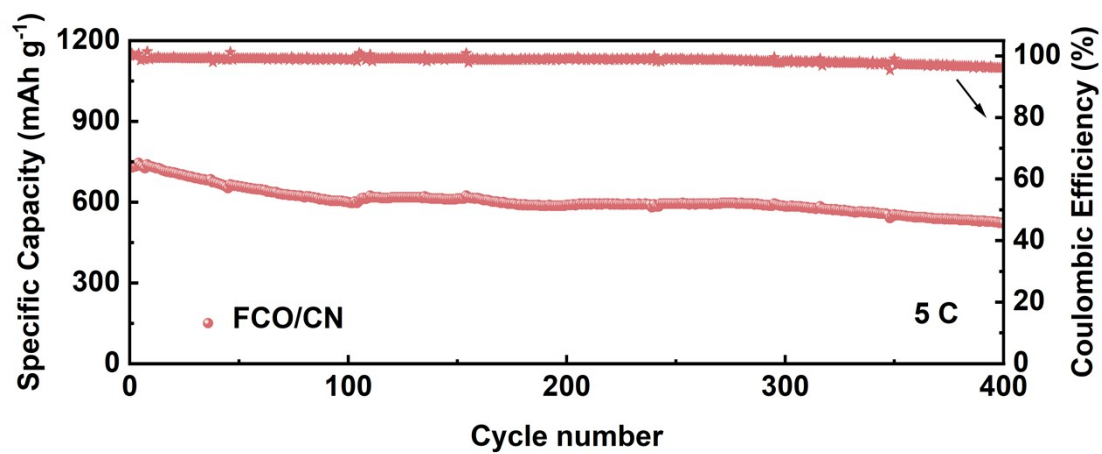

Figure S18. Cycling performance at 5 C.

## References

- [1] G. Kresse, J. Furthmüller, Efficient iterative schemes for ab initio total-energy calculations using a plane-wave basis set, *Physical review B* 54 (1996) 11169, <https://doi.org/10.1103/PhysRevB.54.11169>.
- [2] G. Kresse, J. Furthmüller, Efficiency of ab-initio total energy calculations for metals and semiconductors using a plane-wave basis set, *Computational materials science* 6 (1996) 15-50, [https://doi.org/10.1016/0927-0256\(96\)00008-0](https://doi.org/10.1016/0927-0256(96)00008-0).
- [3] J. P. Perdew, K. Burke, M. Ernzerhof, Generalized gradient approximation made simple, *Physical review letters* 77 (1996) 3865, <https://doi.org/10.1103/PhysRevLett.77.3865>.
- [4] P. E. Blöchl, Projector augmented-wave method, *Phys. rev. B* 50 (1994) 17953-17979, <https://doi.org/10.1063/1.5078432>.
- [5] S. Grimme, J. Antony, S. Ehrlich, H. Krieg, A consistent and accurate ab initio parametrization of density functional dispersion correction (DFT-D) for the 94 elements H-Pu, *The Journal of chemical physics* 132 (2010), <https://doi.org/10.1063/1.3382344>.
- [6] K. B. Wiberg, C. M. Hadad, T. J. LePage, C. M. Breneman, M. J. Frisch, Analysis of the effect of electron correlation on charge density distributions, *The Journal of Physical Chemistry* 96 (1992) 671-679, <https://doi.org/10.1021/j100181a030>.
